# Supplementary material for: Nuclear and mitochondrial genetic structure in the Eurasian beaver (Castor fiber) – implications for future reintroductions
Source: PubMed Central journal article supplement (PMC4105916; doi:10.1111/eva.12162), 2014-06-17

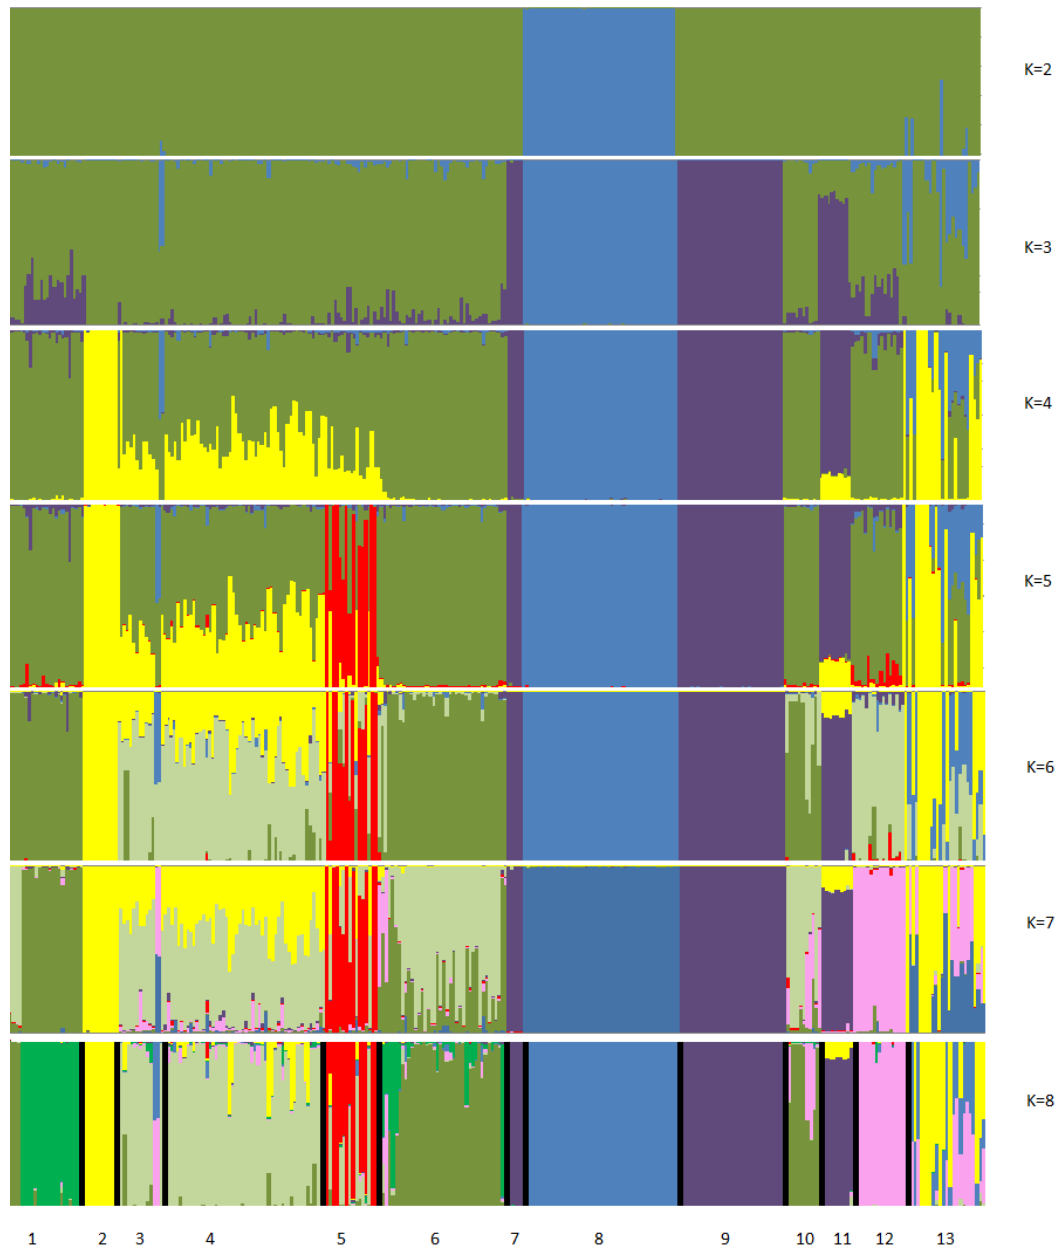

Supplement: eva0007-0645-SD3.pdf [file eva0007-0645-SD3.pdf]
